# Supplementary material for: Cathepsin L activity controls adipogenesis and glucose tolerance
Source: Springer Nature journal article supplement (doi:10.1038/ncb1623), 2007-07-22
Supplement: 41556_2007_BFncb1623_MOESM26_ESM.pdf [file 41556_2007_BFncb1623_MOESM26_ESM.pdf]

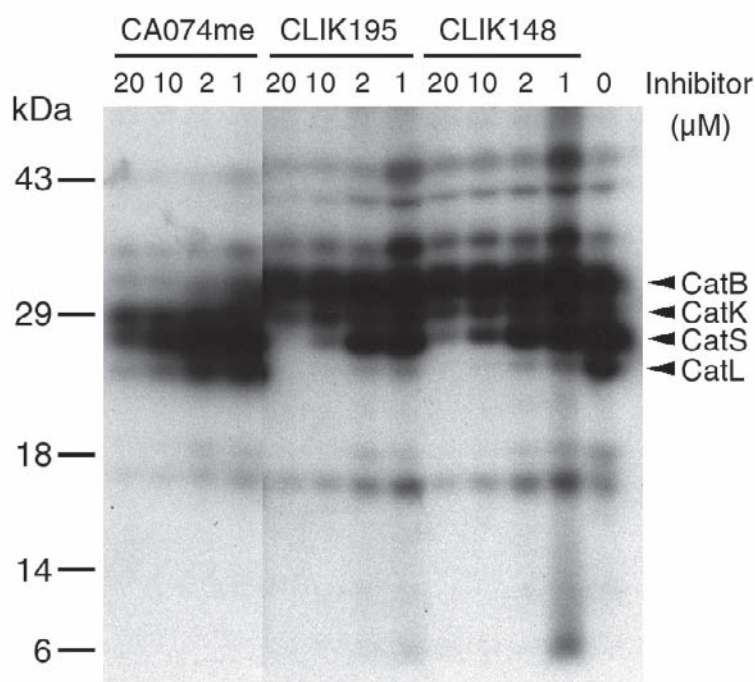

**Supplementary Figure 1.** Cysteine protease active site labeling in peritoneal macrophages treated with cell permeable CatB inhibitor CA074-methyl ester and CatL inhibitors CLIK195 and CLIK148. Macrophages were pre-incubated with different amounts of cathepsin inhibitors (indicated) for 3 hrs followed by addition of [ $^{125}$ I]-JPM-ethyl ester to the culture media. Cells were cultured overnight, lysed, protein concentrations determined, and equal amounts of protein (30  $\mu$ g/sample) were separated on a 12% SDS-PAGE. Gel was stained with Coomassie blue, destained, dried, and exposed to an X-ray film. Both CLIK148 and CLIK195 completely inhibited macrophage CatL activity at 10~20  $\mu$ M. The data from CA074me-treated macrophages were spliced from a separate gel.

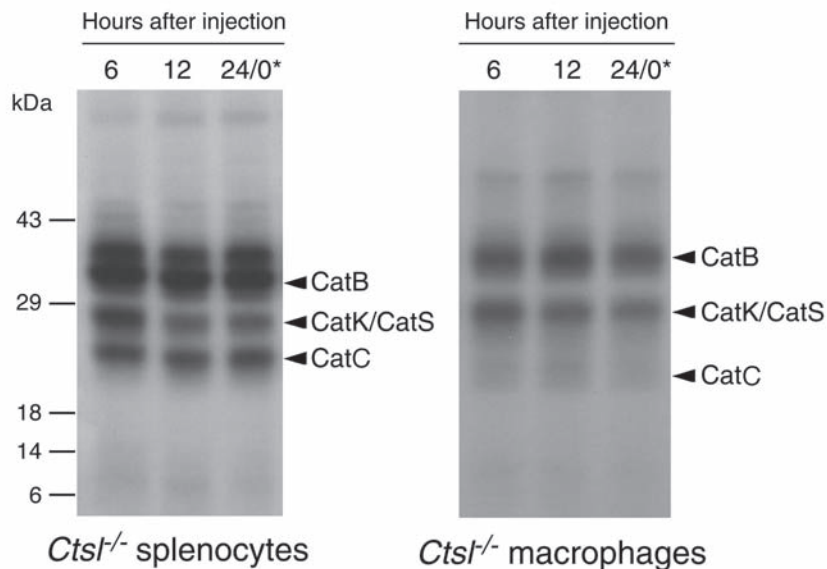

**Supplementary Figure 2.** Cysteine protease cathepsin active site labeling in splenocytes and peritoneal macrophages from *Cts1*<sup>-/-</sup> mice. Mouse splenocytes (left panel) and peritoneal macrophages (right panel) were isolated from *Cts1*<sup>-/-</sup> mice 6, 12, and 24 hrs after CLIK195 injection (i.p. 100 mg/kg/day). Cells were lysed into pH5.5 buffer (J. Biol. Chem. 1992;267: 7258). Equal amounts of protein (30  $\mu$ g) from each sample was labeled with [<sup>125</sup>I]-JPM and separated on a 12% SDS-PAGE. Known active cathepsins are indicated with arrowheads. These data indicate that CLIK195 has limited inhibitory activity to other cathepsins in mice treated with 100 mg/kg/day of this compound. \*Since compound was injected every 24 hours, cells at 24 hours post-injection are equivalent to those before injection (0 hour).

**Figure 1g.** Top panel original figure.

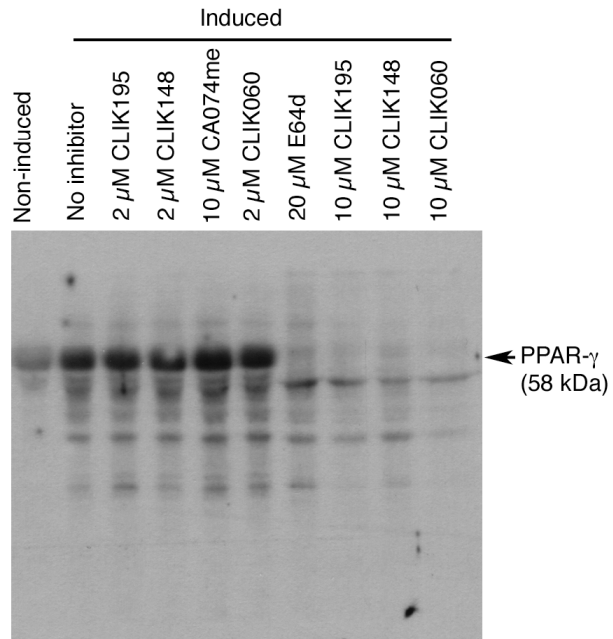

**Figure 1g.** Bottom panel original figure.

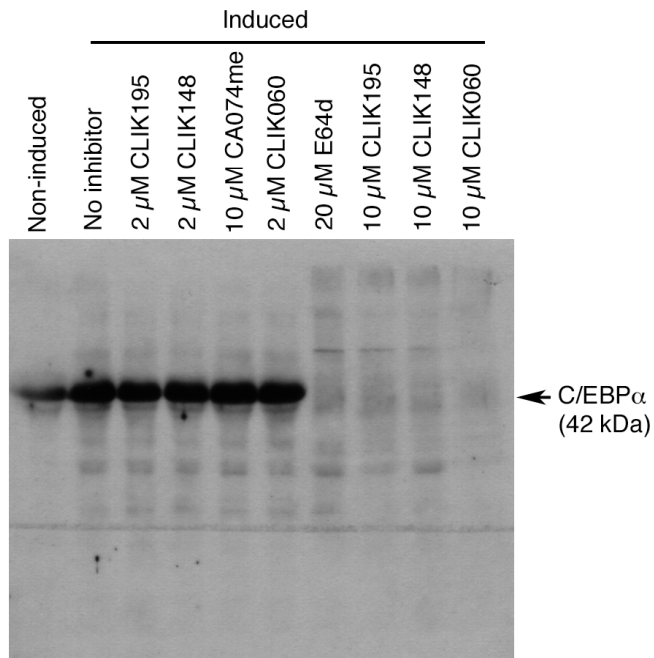

**Figure 1j.** Original figure.

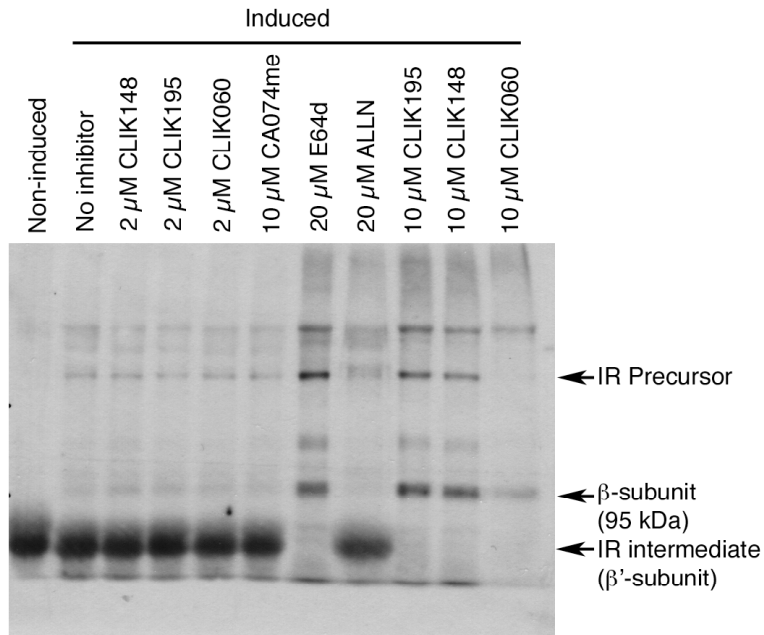

**Figure 1k.** Original figure.

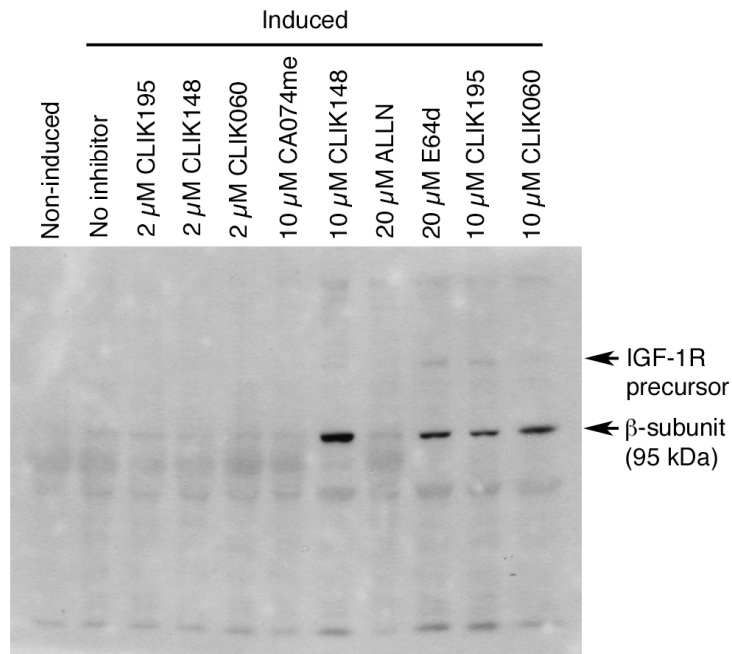

**Supplementary Figure 1.** Left panel original figure.

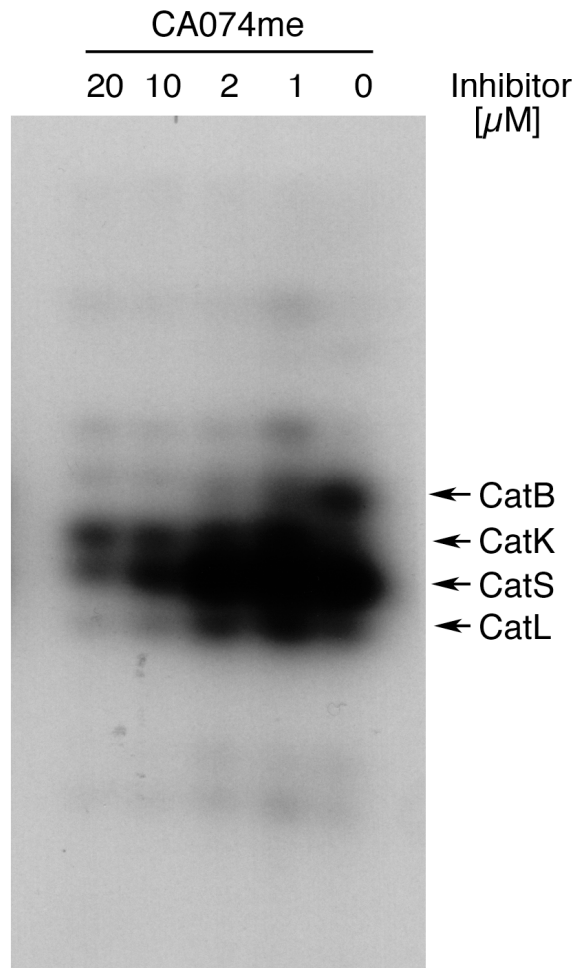

**Supplementary Figure 1.** Right panel original figure.

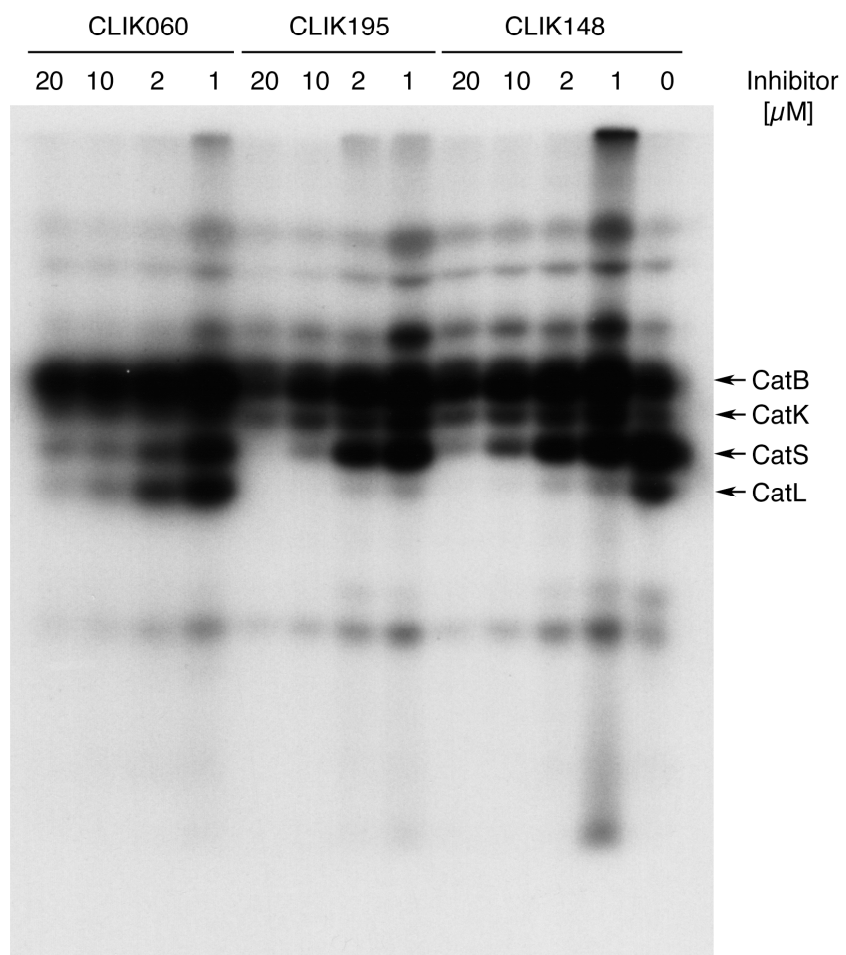

**Supplementary Table 1: Energy expenditure analysis in cathepsin L-deficient mice.**

| <b>Parameters</b>                   | <b><i>Ctsl</i><sup>+/+</sup><br/>(n=6)</b> | <b><i>Ctsl</i><sup>-/-</sup><br/>(n=6)</b> | <b>P<br/>Values*</b> |
|-------------------------------------|--------------------------------------------|--------------------------------------------|----------------------|
| Food Consumption (gram/24 hrs)      | 3.25 ± 0.37                                | 3.7 ± 1.0                                  | 0.74                 |
| Water Consumption (ml/24 hrs)       | 5.83 ± 0.60                                | 7.5 ± 2.5                                  | 0.56                 |
| Fecal Output (gram/24 hrs)          | 2.20 ± 0.24                                | 2.6 ± 0.6                                  | 0.57                 |
| Urine Volume (ml/24 hrs)            | 1.96 ± 0.34                                | 1.2 ± 0.2                                  | 0.12                 |
| O <sub>2</sub> Consumption (ml/min) | 3.49 ± 0.49                                | 3.78 ± 0.18                                | 0.61                 |
| CO <sub>2</sub> Production (ml/min) | 2.31 ± 0.37                                | 2.43 ± 0.15                                | 0.78                 |
| Metabolic Rate** (cal/min)          | 16.34 ± 2.32                               | 17.58 ± 0.85                               | 0.64                 |

\*Mann Whitney test.

\*\*Metabolic rate =  $V_{CO_2} \times 1.106 + V_{O_2} \times 3.941$ .

**Supplementary Table 2: Energy expenditure analysis in CLIK195-treated male C57BL/6 mice.**

| <b>Parameters</b>                   | <b>C57BL/6<br/>(+DMSO, n=8)</b> | <b>C57BL/6<br/>(+CLIK195, n=7)</b> | <b>P<br/>Values*</b> |
|-------------------------------------|---------------------------------|------------------------------------|----------------------|
| Food Consumption (gram/24 hrs)      | 3.20 ± 0.30                     | 3.90 ± 0.20                        | 0.07                 |
| Water Consumption (ml/24 hrs)       | 5.00 ± 0.76                     | 6.86 ± 0.88                        | 0.16                 |
| Fecal Output (gram/24 hrs)          | 2.10 ± 0.20                     | 2.20 ± 0.10                        | 0.60                 |
| Urine Volume (ml/24 hrs)            | 1.80 ± 0.30                     | 1.40 ± 0.20                        | 0.56                 |
| O <sub>2</sub> Consumption (ml/min) | 3.14 ± 0.15                     | 3.11 ± 0.12                        | >0.99                |
| CO <sub>2</sub> Production (ml/min) | 1.99 ± 0.11                     | 1.83 ± 0.11                        | >0.99                |
| Metabolic Rate** (cal/min)          | 14.57 ± 0.68                    | 14.23 ± 0.59                       | 0.67                 |

\*Mann Whitney test.

\*\*Metabolic rate =  $V_{CO_2} \times 1.106 + V_{O_2} \times 3.941$ .



**Supplementary Table 3: Energy expenditure analysis in CLIK195-treated female *ob/ob* mice.**

| <b>Parameters</b>                   | <b><i>ob/ob</i><br/>(+DMSO, n=6)</b> | <b><i>ob/ob</i><br/>(+CLIK195, n=6)</b> | <b>P<br/>Values*</b> |
|-------------------------------------|--------------------------------------|-----------------------------------------|----------------------|
| Food Consumption (gram/24 hrs)      | 3.53 ± 0.27                          | 4.00 ± 0.57                             | 0.58                 |
| Water Consumption (ml/24 hrs)       | 4.50 ± 0.84                          | 4.00 ± 1.24                             | 0.79                 |
| Fecal Output (gram/24 hrs)          | 1.72 ± 0.15                          | 2.23 ± 0.42                             | 0.43                 |
| Urine Volume (ml/24 hrs)            | 1.46 ± 0.18                          | 1.12 ± 0.36                             | 0.54                 |
| O <sub>2</sub> Consumption (ml/min) | 3.15 ± 0.11                          | 2.85 ± 0.03                             | 0.07                 |
| CO <sub>2</sub> Production (ml/min) | 1.97 ± 0.08                          | 1.95 ± 0.04                             | 0.91                 |
| Metabolic Rate** (cal/min)          | 14.59 ± 0.52                         | 13.41 ± 0.15                            | 0.10                 |

\*Mann Whitney test.

\*\*Metabolic rate =  $V_{CO_2} \times 1.106 + V_{O_2} \times 3.941$ .

**Supplementary Table 4: Energy expenditure analysis in CLIK195-treated male *ob/ob* mice.**

| <b>Parameters</b>                   | <b><i>ob/ob</i><br/>(+DMSO, n=6)</b> | <b><i>ob/ob</i><br/>(+CLIK195, n=6)</b> | <b>P<br/>Values*</b> |
|-------------------------------------|--------------------------------------|-----------------------------------------|----------------------|
| Food Consumption (gram/24 hrs)      | 4.00 ± 0.28                          | 4.50 ± 0.18                             | 0.21                 |
| Water Consumption (ml/24 hrs)       | 8.33 ± 0.56                          | 8.00 ± 0.61                             | 0.73                 |
| Fecal Output (gram/24 hrs)          | 1.97 ± 0.09                          | 2.20 ± 0.18                             | 0.37                 |
| Urine Volume (ml/24 hrs)            | 2.06 ± 0.13                          | 2.23 ± 0.27                             | 0.67                 |
| O <sub>2</sub> Consumption (ml/min) | 3.55 ± 0.43                          | 3.05 ± 0.05                             | 0.34                 |
| CO <sub>2</sub> Production (ml/min) | 2.48 ± 0.36                          | 2.07 ± 0.06                             | 0.48                 |
| Metabolic Rate** (cal/min)          | 16.71 ± 2.09                         | 14.30 ± 0.27                            | 0.34                 |

\*Mann Whitney test.

\*\*Metabolic rate =  $V_{CO_2} \times 1.106 + V_{O_2} \times 3.941$ .
